# Supplementary material
Source: PubMed Central journal article supplement (PMC5934314)
Supplement: NIHMS950222-supplement-Supp_info.pdf [file NIHMS950222-supplement-Supp_info.pdf]

## **Supplementary Information**

### **The Modules of *trans*-Acyltransferase Assembly Lines Redefined with a Central Acyl Carrier Protein**

Drew A. Vander Wood & Adrian T. Keatinge-Clay\*

Department of Molecular Biosciences

The University of Texas at Austin, Austin, TX 78712

\*Corresponding author: [adriankc@utexas.edu](mailto:adriankc@utexas.edu)

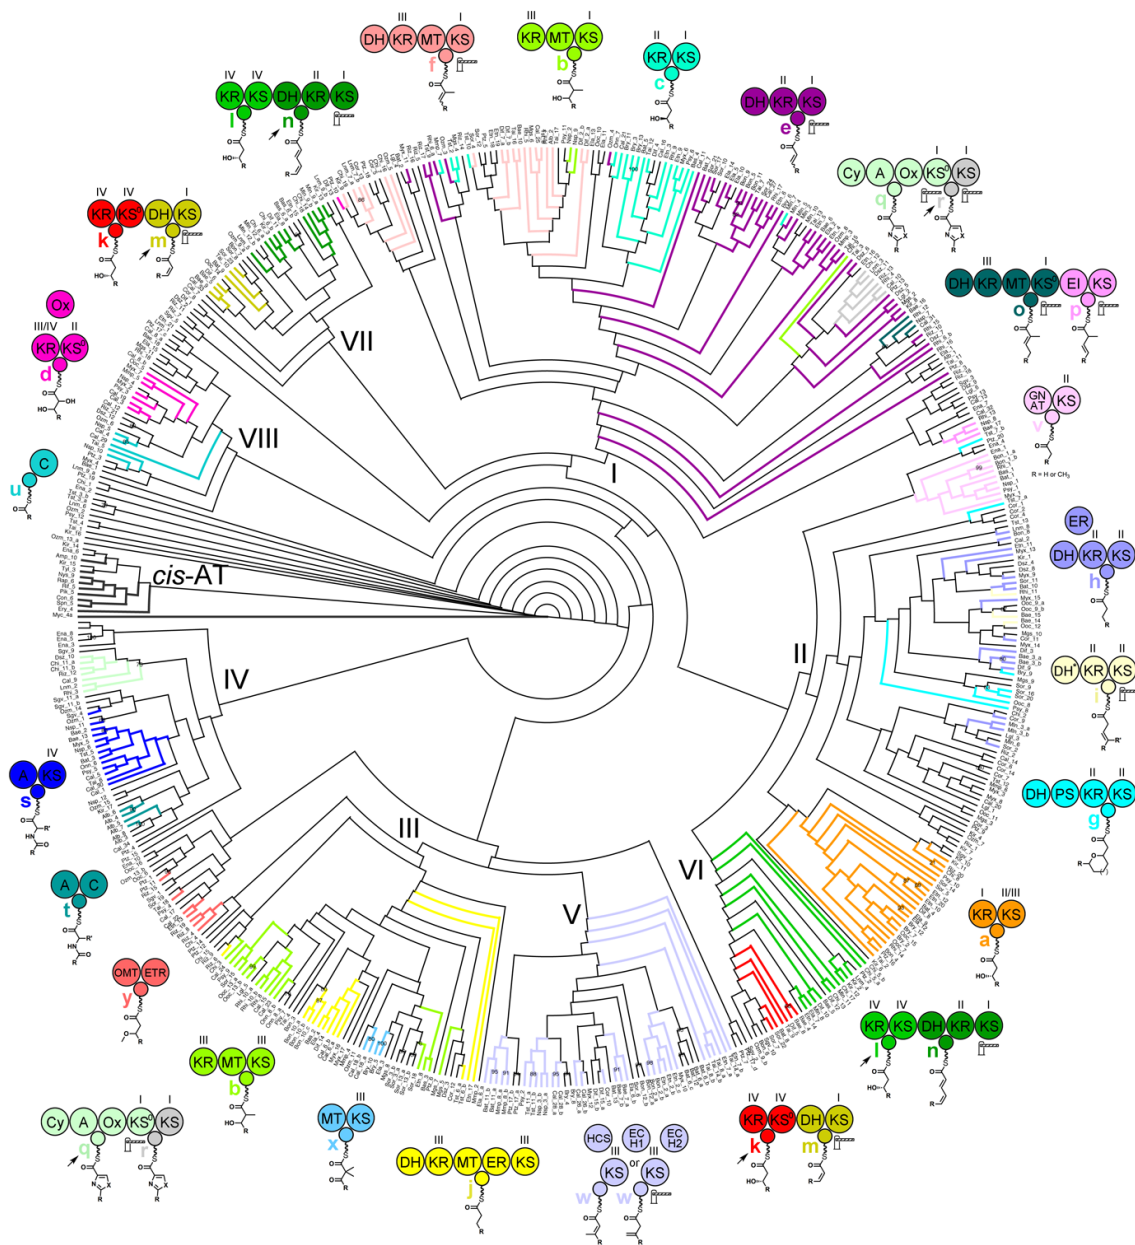

**Figure S1. Cladogram of 526 ACPs from 33 *trans*-AT Assembly Lines.** ACPs from similar types of modules were observed to clade together. They were colored by the module types shown in the cartoons surrounding the cladogram (“module type” is defined by both the chemical moiety a module adds and the classes of enzyme contained in the module). Only the colored ACPs appear in Figure 2. Uncolored ACPs within or adjacent to a clade are often from modules that are very similar to the module type of those ACPs. Next to the cartoons, bold letters (**a-y**) represent module types, and Roman numerals indicate KS and KR clades as defined in Figures S2 and S3. ACP Families contain ACPs from similar module types and are indicated by large Roman numerals within the cladogram.

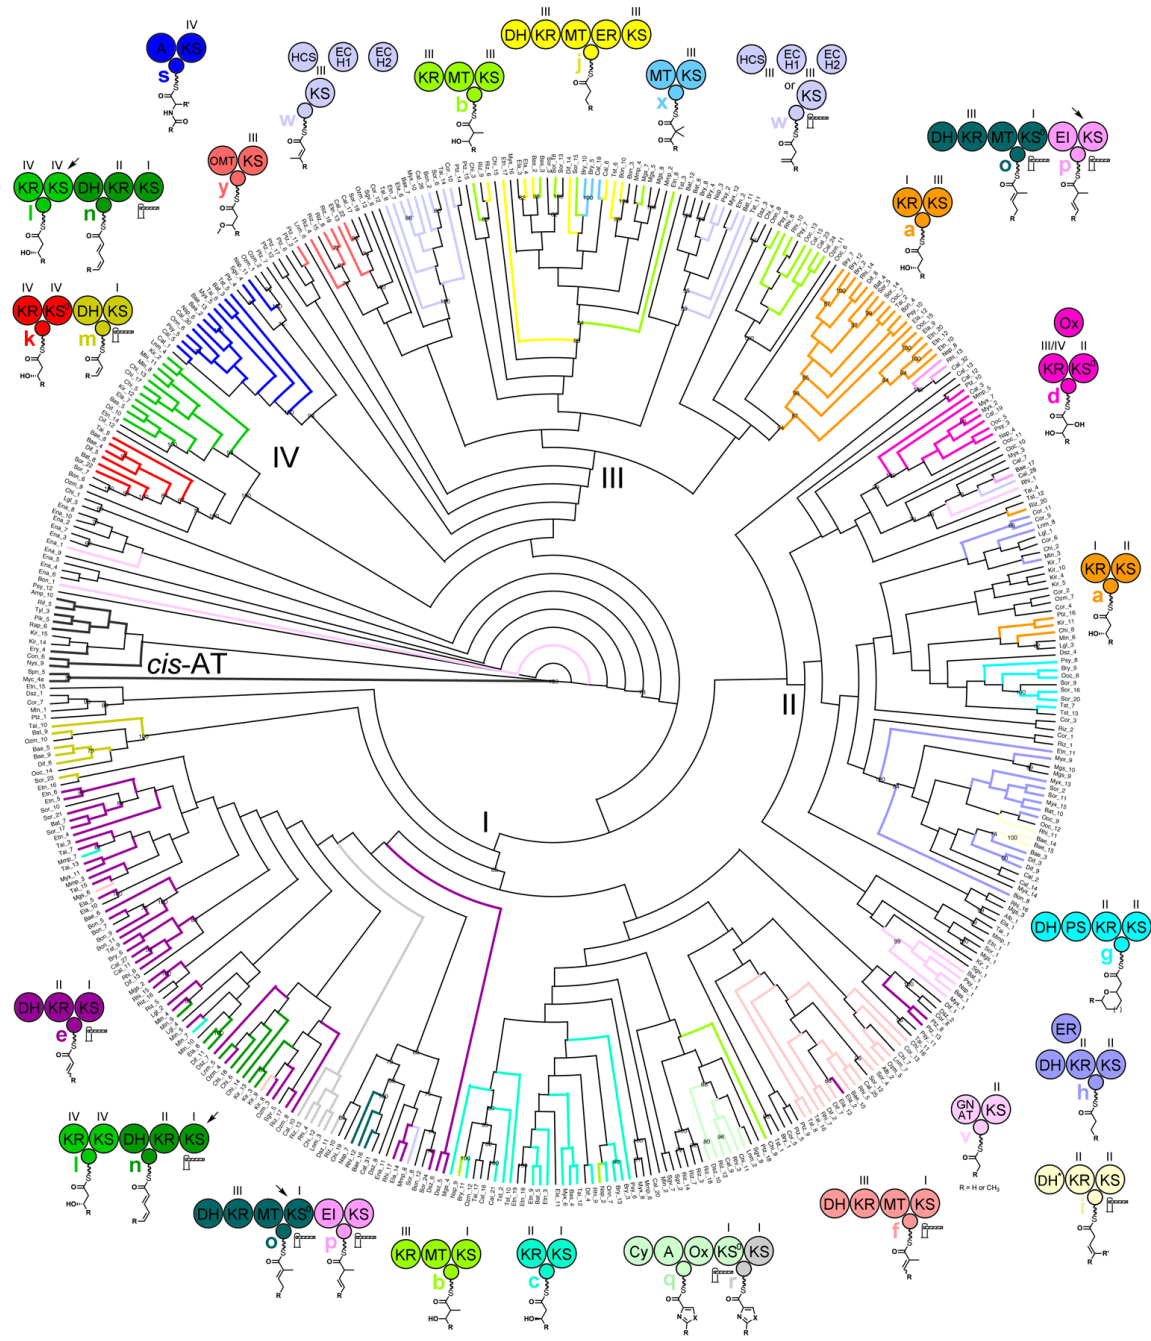

**Figure S2. Cladogram of 423 KSs from 33 *trans*-AT Assembly Lines.** KSs are colored by the module types of preceding ACPs as in Figure S1 (a-y). KSs that are not colored are usually in undefined module types (z) similar to the module types of KSs nearby in the cladogram. The bottom cladogram in Figure 3 only shows KSs associated with a-y modules and *cis*-AT modules. KS clades I-IV are defined here. Most KSs gatekeep for intermediates with  $\alpha/\beta$ -double bonds, as indicated by the gate icon.





Family I:

f o b e c r

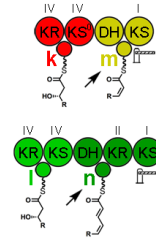

Family I:

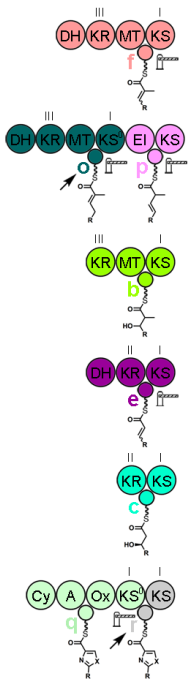

|         |                                                                                    |
|---------|------------------------------------------------------------------------------------|
| Cal_25  | -AVTKRIVASLL--RMSSRQLDI--AQPLEAYGLDSILVVHLTNAMRKH-F--DNITSLLFFEVOIDALVDHLL--       |
| Dif_7_a | ---IKAAAKVLL--KMPAEIENF--LAPLDEYGDLSILIVQLTNELRDL-V--PDISSTLFFEYRIIEELAAFLAE--     |
| Dif_7_b | ---EYLKQIVSAIL--KMPIEDVQV--HTPLEEYGDLSILIVQLTNRVRED-V--PDISSTLFFEYPIHGGGLAEYLV--   |
| Ela_13  | -AVFRDLVGGVLL--KIPAHKIDV--DASPEYGDLSILVVQNLNALKV-F-G--EVSSTLFFEYQIRSLSAFYID--      |
| Rhi_5   | -HYLKQMIIGGLF--KIRPEQIDA--GEPLETYGDLSILVVQLTNLRRDK-L--SGISSTLFFEYQIDALADHVE--      |
| Bae_10  | -EYLLKTLIGEHL--KIPPAQIDA--KAPLETYGDLSIVVQLTNALRNV-L--DQVSSSTLFFEYQIEALVAHLK--      |
| Dif_2_a | ---LLKVIAGEAL--KVPAAHRLA--HEPLTAYGLDSILVVRLTNAIKDV-F-G--SVSSTLFFEYQIEDELADYFL--    |
| Dif_2_b | -TYLTELIGKLL--KIPSGRMDP--SVSITAYGLDSILVVRLTNAFRNV-F--DQMTSTLFFEYQIEEIELADYLL--     |
| Kir_11  | -TQRLRELIGLIL--GIAPSAIDP--BAGFGEYGLDSFGLQNLAAALAAAR-Y-D-VTVPTLFFELGANVTKLAHAHLA--  |
| Kir_3   | ---EIVELVRQVA--ADPDLLVEG--DRGFYDLGLESDDLALVRSFEER-W-N-I-TLYPTLLFFEYPIVDVAVEHLAG--  |
| Chi_18  | ---DMVASAG--GRPADEISL--EDGFYDQGLSSTNLLQMVRLERR-L-G-KRLYPTLLFFEYKSVRELIDHLE--       |
| Kir_13  | ---IVRDLIEA--RTGRADFDE--TAGFYELGLDSTALLGLAADLERV-F-G-VDFSPSTLFFEHNFTLLAAHLRR--     |
| Tai_10  | -RFVRDAIAARL--GVAPAAIDA--DAGFYDLGLDSTMLLLELAETIGAA-I-G-ASLAPSTLFFEHNARELGAWLDA--   |
| Chi_14  | ---MLGGIHL--GEGAEVPL-L-DVGFYDQGLSADLLRLVRLTEKR-L-Q-QOLYPTLLFEHHTVADLAAYLAS--       |
| Chi_6_a | -ARLRQLVAGRL--GRDPESVPI--BRGFYELGLESDDLRLVRELEAL-L-G-EQLYPTLLFEHATIDELAAAYLR--     |
| Chi_6_b | -DALRRKIAGLL--GVPPAQVRS--DSGFYELGLESDDLRLARELEAL-L-G-EQLYPTLLFEHPIIDALVAHLRR--     |
| Bat_9   | -RFLQGLIADKL--GVAPQIDR--DSGFYELGLESAGLLELVDDIEQK-I-D-ASLPPSTLFFEYPIGKLAAYLVE--     |
| Bae_9   | -LFLKLLADKL--GQPWETLDV--LAGFYELGLDSSSLELTVQDISKK-H-G-ADLAPSTLFFEYPIKELAAVLLK--     |
| Sor_23  | -AFLRGVIAEKL--RLPVAEIDR--AAGFYEMGLDSSAGLLDVVRAIEGH-V-G-APLSPSTLFFEYPIAELSAVLYA--   |
| Min_9_a | ---LKELISGVF--NIDLRLIRL--DIGFYEQGLDSSALLAVKLELNK-H-G-EQLYPTLLFEYQIKRELAAVYKE--     |
| Dif_6   | -LYLKELLAARL--NKPVKIIDP--DIGFYEMGLDSSPGLLDVMVKEIQK-I-G-QLLPSTLFFEYPIAELAGLYCE--    |
| Bae_5   | -RYVMNLMAEKI--GKPLEQIDS--QVGYEMGLTSSGLLDVVEITISEK-I-G-ETLPTLFFEYPIAELADAFYI--      |
| Min_9_b | ---LIADIK--GLAPETLRF--VKGFYEQGLDSSVTLNQAQKALEEK-H-G-RELYPTLFFEYPIQKLANFYA--        |
| Lnm_5   | -AHLRELVTGLL--GRAPHAIRD--DAGFYDLGLDSSGHMLDISRRLEEY-V-C-ALPYPTLFFEYPIIDSLAAHYAE--   |
| Dif_11  | -TYIKSEIARLI--NRPAQIDV--RKGFYDMGLDSSAHLKLVKLEQT-F-Q-QQFYPTLFFEYSVRRLEADYLIN--      |
| Ela_8   | ---QIGRLL--HAPAAALDI--HTGFYDLGLDSSAHLQVVRLEKT-V-Q-ALPSTLFFEYPIAELQRLAYIQE--        |
| Lnm_3   | -EHVAACFAEVQ--GIPAEQLHF--RVPLEHYGLSSRLVARENERLRQD-V--QVSSSTLFFEYPIIDAGVAHHLA--     |
| Kir_9   | -DYYKDAFVQVL--EVRDRRLWL--BETVENFGVDSITVPRADLLAER-M-G-DLPPSTLFFEYPIREVDADHVE--      |
| Chi_16  | -TYVKGFSDVLL--KIDPESIQD--HRNFDAVGVDSLVVNLVTKRFEQR-V-G-ALPSTLFFEYKLVVEDLAVFFVD--    |
| Cor_13  | -DYYRQVFSVLL--GLAKERLDF--VPLDRFGVDSLVNKLIVARFEAD-L-G-QQFSTLFFEYKLVKLVKLDHFLA--     |
| Ozm_5   | -RVKAVFARVL--EMEEDLLD--RATFENYGVDSLVVLSLTKELEQE-Y-G-PLPSTLFFEYPIERLARHLLA--        |
| Lnm_7_a | -YYAGVFAEVL--KYESAALDP--EATFETFVGVDSLVSLNIVDRFEQD-L-G-DLPSTLFFEYPIIDQVAGYFRQ--     |
| Lnm_7_b | -SYVTGVFAEVL--KYRAEDLDP--AVTLENFGVDSLVSLNIVDRLEQD-L-G-DLPSTLFFEYPIIDSLAAYLSA--     |
| Ptz_8   | -LKVLAIEVTL--GIANEFLNP--ERTIEDLGLDSSMHVMTNKELESQ-F-F-LGVPPSTLFFAHRITGKVADFLAS--    |
| Ozm_4   | -DHRVALLGQVL--GLSVERIDD--HTALDAYGLDSSVLVMEVNEHLDRD-F-F-PGARGSTLFFEYPIVHDLAAHLLA--  |
| Riz_13  | -NFLAKVYAEES--EVPVVRVEP--SEFERLGLNSYLVGKLNARLARE-G-L-QGLPKLFFYERQIEELQAVYSE--      |
| Rhi_15  | -AFVTRIIDVVV--QIDMAKIH--SEKFEVYGVDSIMAVGVNTELEKY-L-G-SLPKSTLFFEYPIHVNIMQWDFH--     |
| Tst_10  | -GRLRELLGRLC--KLSPQRIDP--RAQFENYGVDSVVRVHQQALGKH-Y-P-GIGSALLVEHTILASLAHLYA--       |
| Chi_12  | -RWLVQVLFASVA--EIPARDVRA--KTPLSYDGLNSLMAMGLYRLLSAE-G-L-ALPSTLFFEYPIHRLDRELVAHVLT-- |
| Rhi_12  | -QLITEVLSKLV--NIAPERLQR--DVAFDRYGDLSILOQSLIQALEKA-H-G-ELSPSTLFFEYPIINQLDYLSS--     |
| Bae_16  | -QFKEILAKSI--KLAPERIQ--ETSFEKYGDLSILOVNFIRELETL-H-G-ELSPSTLFFEYPIINQLDYLSS--       |
| Mgs_4   | -LLKELIAEIV--RLDPARLDA--AAPLDGFGDLSLAVRNLNRRFAQW-F-G-ALPKSTLFFYQPIVNDLGHGLAE--     |
| Min_7   | -RLLTEIVGAEV--GRPADSLD--EDTDRYGDLSLITILGLNSRLEKY-F-G-RVSKSTLFFEYPIVDELSEYFLE--     |
| Tst_2   | -YLYKRVLADIV--KLDPAITDE--HRPLADLGLDSSILLAKLNKALAA-N-F-H-QLPSTLFFEYPIVDELAAVLYAE--  |
| Nep_7   | -EFVRQLSEAVL--RTPANKVRI--TTPPEQVGVDSIVQGLIQKLEQV-H-G-ELSNSTLFFEYPIVRELVDYLLA--     |
| Bas_4   | -MKLSLLGEQL--KISVDQINA--PETLDQVGDLSIVMELNQLKEGI-F-G-ECSKSTLFFEYQVQELQAVYHQ--       |
| Riz_17  | -RWLSGMLQAEI--HLGERLRF--BMPPEQVGLDSVRAMRLTRALEAE-L-G-ELAKSTLFFEYPIVRELQAVYVLE--    |
| Min_4   | -DYLKILISGVV--KIQAHKINA--KDSFEKFGINSLMIMSLISKLEDT-F-G-DLPKSTLFFEYQNIIEELSNFFLT--   |
| Dsz_5   | -DYLRLNIAQAL--KLPVDKIHA--BRDLEDYGINSLMIMELNSMLDRD-F-D-ALPKSTLFFEYKVNVAELAAFFAD--   |
| Myx_11  | -DHLKTVFGRVL--KVPRQLRHD--DVSIGNYGDLSINMLQVISELERD-F-G-PLSKSTLFFEYHRLGELAAHIAE--    |
| Chi_9   | -DELRGVLARVL--KLPASVEDP--EVPDLALGVDSLVMMTKRELSRD-Y-P-DLPATLFFLEHSTLAELAGYFLE--     |
| Tai_13  | -ALLTERLADVI--KLPAPRIDP--BAELTTYGDSSVVMQVTTQLEKQ-L-G-PLPSTLFFEYPIHRLAIAARVA--      |
| Lgl_2   | -NFLRTILLADVI--KCSPEQIDR--NLPFENYGDLSLMIIQLNQRLANE-F-S-ALPKSTLFFEYQNLVELAEYFIV--   |
| Tai_3   | -ARLSALLADVI--KVPVARELP--DAPFERVGDLSLTVVVALNESLGRH-V--DALPKSTLFFEYRILAEILDYFVR--   |
| Ozm_3   | -AFLRKLAEVRI--KLDPELDL--RVPFDRYGDLSLVIIRLNTLELRRH-F-D-DLPKSTLFFEYPIVDELAEYVFAA--   |
| Bry_3   | -RQFKGLAEVI--KLPLEKMDI--QAPLERYGDLSLIVIQVQALAAI-F-D-DALPKSTLFFEYQIDAVVAIVLVE--     |
| Bry_13  | -RQFKGLAEVI--KLPLEKMDI--QAPLERYGDLSLIVIQVQALAAI-F-D-DALPKSTLFFEYQIDAVVAIVLVE--     |
| Ela_2   | -EFFASIVADAL--HQPKELIDA--DASLDKYGDLSVLIIVLTKLEKY-F-G-FVSKSTLFFEYQDRLSLRYFVQ--      |
| Rhi_17  | -RYFKQLLSTLL--KRPVEKIDS--DGSFERVGDSSIILNLTTKLEQS-F-G-SLPNSTLFFEYQVRELSEYFIH--      |
| Mgs_2   | -DLLRNLFAEVY--LQDAEHILA--BEKLETYGISISIVELTSKLEDT-F-G-SLPKSTLFFEYPIVDELQVAGYVFA--   |
| Kir_8   | -EFLRGVLAEVL--QVPOEIEA--DTAFEQYGDLSLIMDLTRRLRDEH-F-G-SLPKSTLFFEYQVRELQVAGYVFA--    |
| Etn_6   | -QVKLLAPVI--KLPFERIDA--AASFETYGISVMAVELTRLEAV-F-G-PLSKSTLFFEAQVRELADYVFE--         |
| Tst_9   | -RLLQRIVAGEL--KLPPEQLRI--DQPLDQVGDSDVMKATRELEKT-F-G-ILPKSTLFFEYPIVDELAVHFAE--      |
| Ela_14  | -TYFSHQADFV--KLPYHEIHS--DVTLDKYGISLIMQLVSHFEKQ-F-G-PLPSTLFFEYQVRELQVAGYFIS--       |
| Min_5   | -DFTIKVIAAEF--RMPADKIDA--BEALEKYGLDSVMIINMTELEKH-F-G-ALSKSTLFFEYQVRELQVAGYVFE--    |
| Etn_4   | -LLRKVLSSSL--KVPLERIEG--DTPLEDRYGISVVMVMELETRLEKT-F-G-PLSKSTLFFEYQVRELQVAGYVFE--   |
| Etn_5   | -DYFRKQVASAL--KPLDRVDA--DTPLERYGDSSVVMHLTSALEKH-F-G-PLSKSTLFFEYQVRELQVAGYVFE--     |
| Bry_6   | -DYLKNVFATV--QIPEKNIYV--HETLDKYGDSSVVMKMTNLEKVF-F-G-KLSKSTLFFEYQVRELQVAGYVFE--     |
| Bae_6   | -HFLKQVLSVVI--KLPVGKIDA--KAPMEDYGDLSIMIMHLLTGRLEKS-F-G-SLSKSTLFFEYQVRELQVAGYVFE--  |
| Bat_7   | -RFLTLLSAPL--KLAADRIFP--DVGLEKYGDLSILALQVSELERP-F-G-PLPKSTLFFEQVRELQVAGYVFE--      |
| Sor_17  | -RYLKRLLSTAL--KMPDRIDP--AAALEQYGDSSILALRMVSELEAT-F-G-PLPKSTLFFEQVRELQVAGYVFE--     |
| Sor_21  | -QYLKRLLATM--KVPFQIEIP--DAPLEKYGDSSIMALGLVNLKLEAT-F-G-SLPKSTLFFEYQVRELQVAGYVFE--   |
| Ela_5   | -ALLKQRLSAVI--KIPPAQIEIP--NAQLEKYGDSSVMMVTLTNALEQT-F-G-ILPKSTLFFEYQVRELQVAGYVFE--  |
| Cal_11  | -LYFKSLLCDL--RLPTHRIRA--EPELERYGDSSIMVMTNQTLETV-F-G-SLSKSTLFFEYQVRELQVAGYVFE--     |
| Bon_11  | -RYLTGLMAGGL--KLSPERIDA--EPELERYGDSSVLAVKLVQDLEQV-F-G-PLSKSTLFFEYQVRELQVAGYVFE--   |
| Bon_5   | -RYLVGLLSRSL--KLPQRIDA--QAPLEQYGDSSVLAITLTDQLEQV-F-G-PLSKSTLFFEYQVRELQVAGYVFE--    |
| Bon_9   | -HYLVGLLSHSL--RMPQRIDA--QAPLEQYGDSSVLAITLTDQLEQV-F-G-PLSKSTLFFEYQVRELQVAGYVFE--    |

Family I:  
f o b e c r

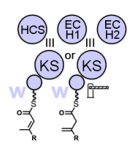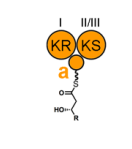

|          |                                                                                        |
|----------|----------------------------------------------------------------------------------------|
| Tai_7    | --ALLKRLSTAL--HHPASRLDA--HAPLERYGIDSIIVVSMNGELEKA--F--G--SLSKTLFFFEYRHLHELACFYVA--     |
| Sor_24   | --RYLKQVLVAS--ELPAARIDA--BARLEAYGVDSVMSVRMTGELEKA--F--G--SLSKTLFFFEYQSLAALADYFLE--     |
| Dsz_6    | --DYLKGFHFAVF--KMDAAQIDP--QTSFDDYGLDSLVIVELHARLDKD--M--PLPRTFFFEYRVRRAVADHLLA--        |
| Bry_11   | --QKFKELLSEHI--QVPAERLGS--QOKFESFGDISLIINQLNKDLSLV--F--G--EISKTLFFFEYRHLIELVDYLIA--    |
| Psy_6    | --DQLRRLFADVM--RLSVDVDDV--QAPLESFGLDSVVVYLNQRLRDA--F--G--EVSATLFFFEYRHLADLADFLAA--     |
| Cal_21   | --DRICQLLGSVI--GLDAEDIDA--QEPLESYGLDSVLMQLTDALAV--F--G--ALSKTLFFFEYRHLNLDLADFLVE--     |
| Onn_7    | --QEMKTLGSLVI--GLVPEIDA--QKPLENYGLDSIAITQLNEKLDGV--F--A--DLSKTLFFFEYRHLDELVDLILA--     |
| Ptz_13   | --SILSEVA--AIPLNRIID--ELPFEQYGLDSMMIIRLNAMERD--L--G--ALPKTLFFFEYRHLGELIANYLSH--        |
| Bat_5    | --QRRLQFLSDV--KLGAEIRDV--DEPLTAVGIDSLMILHLNKRKLDV--F--G--SKLSRLLFFFEYRHLRKLGEYLS--     |
| Etn_3    | --RLRGLFADV--KLPSSQIDP--RESLELYGIDSLIMLRNLKALS--F--G--DISKTLFFFEYRHLAALAGHLSAR--       |
| Rhi_9    | --ERLKAVFCEV--KLPFARVES--DALLEQYGLDSITMIRLNKALEDA--F--G--SQLSKTLFFFEYRHLDKLHGYLVE--    |
| Etn_9    | --RLKELLAVV--TTEAERIDG--AEPFEAYGLDSITMIRLNQRLA--F--G--AISKTLFFFEYRHLLEGLAQHLEA--       |
| Myx_6    | --TKLKLAFSEV--RYEERRIDA--RQPMERYGLDSITMIRLNQAL--F--G--Y--ALSKTLFFFEYRHLAEVSGYLAE--     |
| Rhi_4    | --NHIKRHFVKV--AIPEHNLDC--EDTFDRYGLTSLMIRLNQRLAQE--F--G--ELSATLFFFEYRHLAALAGYFVA--      |
| Cal_10   | --PHLKTLLIAQV--EIPISRLNE--RATFDYGLTSMIRLNQRLAQE--F--G--ECSKTLFFFEYRHLAALAGYFVA--       |
| Dsz_11   | --GLLSSCPAEVA--EIPRRSLDP--EVPDDRGLNSMLIAQLSARLEAL--L--G--ELPKTLFFFEYRHLAALADWLVVA--    |
| Tai_15   | --KAMPADAF--KMSDDVLE--TAEFADYGLDSIVLRLMTRQLEKH--F--G--PLSKTLFFFEYRHLRDLADLADYFVR--     |
| Tai_12   | --ERLKHVLSAE--GIAVSRIDA--DEPFDAYGVDSVVVMTVNRALDDV--F--G--DALSKTLFFFEYRHLGALAGHLSA--    |
| Mmp_3    | --GLLRTVLVTV--RVSPAQLQD--DRHFEHYGLDSLMVIMQMTAELEKS--F--G--SLSKTLFFFEYRHLIKELADYFTR--   |
| Dsz_7    | --GFLKRVFSEQW--QLPIHRIDA--EQSLDQYGLDSIMAMSLTRRELETF--F--G--ELPKTLFFFEYRHLAALAGYFVA--   |
| Rhi_6_b  | --AQLRAMLASL--GIALEQIDD--ACCFEYGLDSIKIMEMTSLVEKR--F--G--ALPKTLFFFEYRHLAALAGYFVA--      |
| Mmp_7    | --QVLRVLSPVV--QWPEDRIDS--DEPLERYGLDSMMVMTITAALEAQ--F--G--ALPKTLFFFEYRHLAALAGYFVA--     |
| Ozm_8    | --TYLRELLADEL--KMALEDVAE--DEAFDHYGVDSLVLVSLTRALEER--F--G--PLSKTLFFFEYRHLGELADFLVA--    |
| Rhi_6_a  | --RRLLDLII--KIDESRLND--DEPFKYGLDSIMVMDTAALEKR--F--G--PLPKTLFFFEYRHLAALAGYFVA--         |
| Nsp_5    | --RYLTCILVEFL--DLPSDRIDE--NKHLQDYGIDSLAGMRVIRLSLET--F--D--IEVLRGDLQHPHRSLSKHLISQ--     |
| Cal_4    | --KALMAM--RLPPEKING--DKHLQDYGIDSLMGDLIRLEKA--F--S--KMYVGRDLAHPHRSLSKHLISQ--            |
| Ptz_10   | --KAALVKHL--KVDHALLKS--DTSFVLDGIDSLKALHIAETLATT--L--S--IEVEPALLASHPVEELKAVLDV--        |
| Cor_10   | --VLRSLLAGV--FTEPEAIEA--SRPLVELGLDLSVGLIEFMDKVNQR--F--A--IKVSPKLVYRHPHRSLSKHLISQ--     |
| Chi_3    | --HRVAEVALAL--GSTVAEVP--SAPFVEYGVDSIIGVDLVNRLNGA--F--G--LALRAVLYDHPVNDVNSSELLWQ--      |
| Cal_28_a | --QTLRTSLAEEL--GEMERMDVE--TIPLETGLDSTIGVTWVRINRH--Y--G--LDIATARLYDPSNLAFAFVMAE--       |
| Cal_28_b | --ETLRTMLAEEL--GEMPERVDE--HAPLTELGLDSTIGVTWVRINRH--Y--D--MDISAALKYDHPHRSLSKHLISQ--     |
| Tst_11_a | --ALLKSLAAEI--QLSADLEDD--HAGFVLDGLDSVAVTWARLGR--L--S--IELTPAHVYQYRVAKLAAYLRE--         |
| Tst_11_b | --EIVRQLAAEL--QLDAQDIDA--HASFVDMGLDSVAVTWARLHER--L--A--VDLSPQLYQHPHRSLSKHLISQ--        |
| Psy_2    | --KLLREMLAREL--HMAVEDIDD--DRPFLDMGLDSVIGVTWVRKLN--F--G--LSITITKVVYRHPHRSLSKHLISQ--     |
| Bat_11_a | --LKQLLSSVVL--GIDILEIGD--DDAFVLDGLDSVIGVQVWVRIIN--F--G--IDIDAVRIYDHPHRSLSKHLISQ--      |
| Bat_11_b | --RRLLSVTVL--GLEPQDIAD--DDFVLDGLDSIMAIQVWVINSQ--F--S--LDLEAVRVDYDHPHRSLSKHLISQ--       |
| Nsp_3_a  | --TLRENTAAEL--FLEPDEIDE--DAKFVLDGLDSISAVMWIKRINAK--F--D--LSLPAATVYDHPHRSLSKHLISQ--     |
| Nsp_3_b  | --NILIESLAEL--FMEATEIDE--EAKFVDMGMDSTAVTWMRKINQL--F--G--SSLPAATVYDHPHRSLSKHLISQ--      |
| Ela_6_a  | --EELTRSLAGAL--GLEESITIA--DKNFIDLGLDSIMGVWIKSINTA--F--G--ELGAAARLYDHPHRSLSKHLISQ--     |
| Bae_7_b  | --AVLTESLADVL--YMDADDIDA--DDTFIDIGMDSTIGLEWIKSVNKA--Y--G--SLTAVTKVYDHPHRSLSKHLISQ--    |
| Etn_7_b  | --DELSKALADVL--YMERHEVDI--DEAFIDLGMDSITIGLEWIKAVNKR--Y--G--DCNVTNVYDHPHRSLSKHLISQ--    |
| Etn_7_a  | --RLRSLARAL--CTDEADLQD--DAVFNLDGLDSVIGVEWARSIERE--L--D--VPLTASLYDHPHRSLSKHLISQ--       |
| Ela_6_b  | --QLLAAAL--YADASDIDP--DRLVDRHGVDSSVIVWVRINAT--F--H--LDLKAATLYDHPHRSLSKHLISQ--          |
| Cal_26_b | --EELTRSLAGAL--SLLPGESIF--DRNFVDMGLDSIIGVEWHTQINAR--Y--G--LAVIVTKYDHPHRSLSKHLISQ--     |
| Cal_26_a | --VEVDRMLAEAL--FMQPEVDIT--TPPIAMGLDSIIGVEWHTQINAR--Y--G--LELQATRIVYDHPHRSLSKHLISQ--    |
| Myx_10   | --ASLADAL--FMQVDDISL--DKPFIEMGLDSIIGVEWHTQINAR--Y--E--LSLPAATLYDHPHRSLSKHLISQ--        |
| Bon_2_a  | --EELATSLAQAL--YIDRAQVNA--RSTFVELGLDSVIGVEWHTQINAR--Y--G--LSLPAATLYDHPHRSLSKHLISQ--    |
| Bon_2_b  | --AASLAEAL--YLDSSVDV--DRPFAELGLDSIIGVEWHTQINAR--Y--G--LALNATLYDHPHRSLSKHLISQ--         |
| Etn_2_c  | --VELAKSLADAL--YMEPQDVID--DRPFAELGLDSIIGVEWHTQINAR--Y--G--VSLPATLYDHPHRSLSKHLISQ--     |
| Etn_2_a  | --QELTSLAEAL--FMDRADVEP--DRPFMELGLDSVIGVEWHTQINAR--Y--G--LSLPAATLYDHPHRSLSKHLISQ--     |
| Etn_2_b  | --EGLTSSLAEL--YMDRAEIDP--DRPFTLGLDSVIGVEWHTQINAR--Y--G--LSLPAATLYDHPHRSLSKHLISQ--      |
| Tai_14_a | --LRALLADAL--YVDAQTIDA--NAEFVSLGVDSIIGVEWHTQINAR--Y--G--VALSATLYDHPHRSLSKHLISQ--       |
| Tai_14_b | --AALREMLADAL--FADAHDIEP--DAFQDLGVDSIIGVEWHTQINAR--Y--G--TSIPAPQIYDHPHRSLSKHLISQ--     |
| Tai_8_a  | --LAAAL--MATDEIDR--BQTFNALGVDSVIGVEWHTQINAR--Y--G--TALPATLYDHPHRSLSKHLISQ--            |
| Tai_8_b  | --HLVDSLQAL--YVEPAEIGV--DQPFALGLDSVIGVEWHTQINAR--Y--G--TALPAVALYDHPHRSLSKHLISQ--       |
| Mmp_8_a  | --FLRQSLAAML--YCFPGQIRD--GSRFLELGLDSVIAAQWIREINKH--Y--Q--LKIPADGITYDHPHRSLSKHLISQ--    |
| Mmp_8_b  | --DYLKQSLGELL--FLDPGQLRS--GAQFLDLGMDSVTCIQWMRGVSRH--F--S--IQLAADAIYDHPHRSLSKHLISQ--    |
| Cal_29   | --LVALIADLV--ELPQEQIER--DRPLQYLGWDSVLTQLQWVRLDER--F--A--VTLNRELEHDPHRSLSKHLISQ--       |
| Bon_1_a  | --AVREHIEQVL--GEARVDSYGE--HTPLMSMGLSSFDLAELRKRIGAR--L--G--MTLDAFLLRHGPALREALE--        |
| Bon_1_b  | --SVREHIEQVL--DGRDIDAYGA--TVPLMSMGSSFFEMDLRRLAAR--F--G--VALDATFLFRHGPALREALE--         |
| Min_3_a  | --SILTRITIGVL--KIEEREFDF--ELPISEYGFDSIMFIMLGNELNET--L--G--ISMPSDFEGLTDFNLEFLKLS--      |
| Sgv_4    | --QIAREWRRLL--GVTEVDF--DLTFFAAGNSVLLGTFLARLSAR--F--A--ARLEMGDLFHPHRSLSKHLISQ--         |
| Tai_5    | --AVIRDALQAL--GVAPDAFEL--AVPLGEGYDGLDMLDHLATRIEET--L--G--VQLSVEFLFAHRLGALRHVAE--       |
| Chi_8    | --EVVRRMAEII--GLEPERLGV--DVNLGVDGFDSIDLKTSARIDDR--L--G--VTVSPVFFSHDPVRLVDHLLA--        |
| Bon_4    | --WDLAQVAELM--QIPREAIISA--HTNLAEYGFDSLALDEFARRLARH--F--S--IELTPLFFYSHPHRSLSKHLISQ--    |
| Psy_10   | --WTLREHVGRLV--GLAPEGLHF--DANLVDVGFDSIGLMEASALSEH--F--G--WSIQPHFFGHASLSALQACLLQ--      |
| Tai_2    | --PALRGIAARVL--GADAALLDE--QASFADLGFDSIGLMDFAVARAGEA--F--G--IDMSFAMFLSHVTLKRLAGHLAT--   |
| Etn_12   | --HAEAVL--KIPAGRIDE--ETSFADIGFDSIGLAQFARLLTTQ--L--G--FDVPLNALLNHSIRKLAGHLVR--          |
| Etn_10   | --LKSCVEAVL--KVPASRLSE--DTSFADIGFDSIGLQFARLLSKH--F--G--FEIVPVSFFSYTHLEKFCGHLLE--       |
| Etn_20   | --VKARVEGAL--KLPAGRLDE--DASFADIGFDSIGLAQFARLLTRH--F--G--FEVMPNVFFSYTHLEKFAHLVE--       |
| Ooc_15   | --NRLKTLINRLL--GTPLERIGL--DSCFADFDFDSITLASFRELSQH--F--N--LDITPVLVFGHSSVKKRLEFYFCR--    |
| Ela_9    | --WDLRRQVSELL--KLSIDNVEI--DVNLADFDFDSVSLMELSKRLSAY--Y--N--IAITPAVFFGVALLKQLQSFYMT--    |
| Ela_12   | --WDLRRQVSELL--QLGMEKVA--DVNLADFDFDSVSLMELSKRLSAY--Y--G--VEVTPAVFFGVALLKQLQSFYMT--     |
| Bry_7    | --LDLKTLLITEQL--KIPSAHLVD--ESNLADFDFDSVSLANFSTRALSIIH--Y--H--FNITPVSFFGVALLKQLQSFYMT-- |
| Bry_12   | --WDLKSLIVQQL--KLPIDKVEI--ESNLADFDFDSVSLANFSTRALSIIH--Y--N--IDVTPSIFFFGVALLKQLQSFYMT-- |
| Bry_2    | --EDLQNYINQLL--KIPKQLDI--KRNADFDFDSVSLANFSTRALSIIH--F--T--IEVTPVFFGVALLKQLQSFYMT--     |

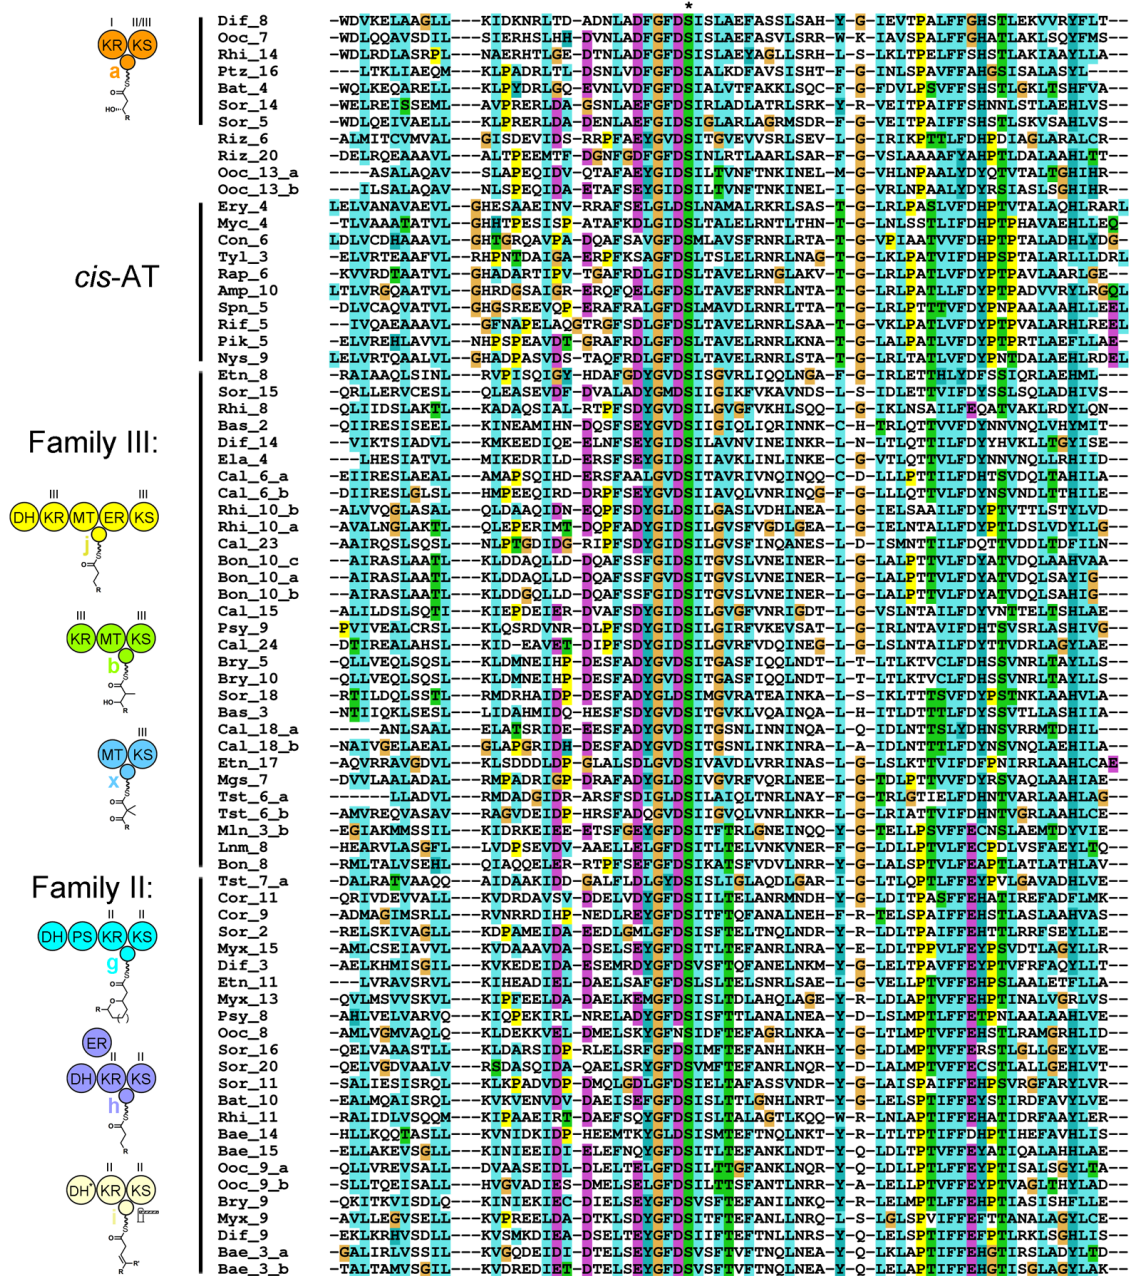

**Figure S4. Sequence Alignment of 526 ACPs from 33 *trans*-AT Assembly Lines.** A ClustalX sequence alignment performed on the ACP domains show that they largely group with others from their module type or ACP family (Figures S1 and 2). Relative gaps and insertions are observed and described in Figure 4. The serine that becomes phosphopantetheinylated is indicated with an asterisk.
